# Supplementary material
Source: publisher site journal article supplement (https://www.spandidos-publications.com/2147/downloadSupplementary)
Supplement: Supplementary file 2 [file downloadSupplementary]

## Sheet: brown_gene_Go
Table SIV. Go term and KEGG pathway of brown module
ID	Description	GeneRatio	BgRatio	pvalue	p.adjust	qvalue	geneID	Count
GO:0070851	growth factor receptor binding	25/1021	134/17697	1.68012e-07	0.000154739	0.000142368	AREG/BTC/CBL/CD300LF/CDH5/CSF2/ECM1/EREG/FGF1/GREM1/HBEGF/HIP1/IL10/IL11/IL12A/IL1A/IL5/IL6/ITGA5/KL/PDGFB/SDCBP/SHC1/SOCS5/VEGFA	25
GO:0005126	cytokine receptor binding	39/1021	286/17697	5.08e-07	0.000233934	0.000215232	BMP3/CCL13/CCL18/CCL23/CCL26/CCL5/CCL7/CCL8/CD300LF/CDH5/CSF2/CXCL2/EBI3/ECM1/ENG/FKBP1A/GREM1/IL10/IL11/IL12A/IL13/IL1A/IL5/IL6/ITCH/ITGA5/JAK1/LIF/NTRK1/OSM/PXDN/SDCBP/SH2B3/SHC1/STAT3/TNFSF10/TNFSF13/TNFSF18/VEGFA	39
GO:0005125	cytokine activity	32/1021	220/17697	1.29027e-06	0.000396112	0.000364444	AREG/BMP3/CCL13/CCL18/CCL23/CCL26/CCL5/CCL7/CCL8/CMTM8/CSF2/CXCL2/EBI3/EDN1/FAM3D/GPI/GREM1/IL10/IL11/IL12A/IL13/IL1A/IL5/IL6/LIF/OSM/TNFRSF11B/TNFSF10/TNFSF13/TNFSF18/VEGFA/VSTM1	32
GO:0005201	extracellular matrix structural constituent	24/1021	163/17697	2.16235e-05	0.00449938	0.00413966	COL15A1/COL18A1/COL4A1/COL4A2/COL6A5/COL6A6/ECM1/HSPG2/LAMA5/LAMB1/LAMC1/MATN2/MMRN1/MMRN2/MUC4/POSTN/PRG2/PXDN/TGFBI/THBS1/TINAGL1/VTN/VWA1/VWF	24
GO:0038024	cargo receptor activity	16/1021	85/17697	2.44266e-05	0.00449938	0.00413966	AP2A2/APOBR/ARRB1/CFI/ENPP3/HIP1/ITGAM/LDLR/LGALS3BP/LOXL2/LOXL3/LOXL4/SCARB1/TINAGL1/TMPRSS5/VTN	16
GO:0050839	cell adhesion molecule binding	51/1021	499/17697	5.2361e-05	0.00766191	0.00704936	ACTN1/ADAM15/ADAM8/ARHGAP1/ASAP1/CALD1/CBL/CD151/CDH1/CDH13/CDH26/CDH5/CHMP5/CSNK1D/CTNNAL1/DCHS2/EHD4/EPS15/EPS8L2/FAP/FASN/FCER2/FGF1/FLNA/ITGA5/LAMA5/LAMB1/LASP1/LIMA1/MPP7/MYH9/NOTCH3/P2RX4/PAK2/PCBP1/PICALM/POSTN/PRKCA/PROM1/PTPRO/PVR/PXN/S1PR3/SLC3A2/SWAP70/TGFBI/THBS1/THY1/TLN1/VTN/VWF	51
GO:0001228	DNA-binding transcription activator activity, RNA polymerase II-specific	46/1021	439/17697	6.65756e-05	0.00766191	0.00704936	ATF3/CDX4/CEBPA/CEBPB/CEBPE/CSRNP1/EGR1/EGR2/ELF4/ELK3/ETV5/FOSB/FOSL1/FOSL2/FOXF2/GATA1/HNF4G/HOXD10/HOXD8/IER2/JUN/JUNB/JUND/KLF10/KLF13/KLF4/KLF6/MACC1/MEF2D/MEOX1/MYC/NKX6-3/NOTCH1/NR4A1/NR4A2/NR4A3/OVOL1/PGR/RBPJ/REL/SOX17/SRF/STAT3/TFAP2A/TFAP2C/TFE3	46
GO:0005178	integrin binding	20/1021	132/17697	6.79565e-05	0.00766191	0.00704936	ACTN1/ADAM15/CD151/CDH26/FAP/FCER2/FGF1/ITGA5/LAMA5/LAMB1/MYH9/PRKCA/PXN/S1PR3/TGFBI/THBS1/THY1/TLN1/VTN/VWF	20
GO:0005154	epidermal growth factor receptor binding	9/1021	33/17697	7.48721e-05	0.00766191	0.00704936	AREG/BTC/CBL/EREG/HBEGF/HIP1/ITGA5/SHC1/SOCS5	9
GO:0070492	oligosaccharide binding	6/1021	15/17697	0.000115847	0.0106695	0.00981648	ITLN1/LGALS1/LGALS12/LOXL2/REG1A/SELP	6
GO:0035259	glucocorticoid receptor binding	6/1021	16/17697	0.000176327	0.0147634	0.0135831	CEBPB/NR4A1/NR4A2/NR4A3/STAT3/TACC1	6
GO:0030695	GTPase regulator activity	33/1021	304/17697	0.000364652	0.027987	0.0257495	ADPRH/ARAP3/ARHGAP1/ARHGAP17/ARHGAP29/ARHGAP31/ARHGEF6/ARRB1/ASAP1/CDC42SE1/CHN1/CPEB2/DOCK5/GMIP/JUN/MYO9B/NRP1/RAP1GAP2/RGS16/RGS18/RGS2/RGS4/RGS5/RINL/SEC23A/SESN2/SH3BP1/STARD13/STXBP5/TBC1D8/TBC1D9B/TBCD/THY1	33
GO:0035091	phosphatidylinositol binding	28/1021	245/17697	0.000436234	0.0309055	0.0284347	ARAP3/ASAP1/CCDC88A/FES/GAB2/GPAA1/GSDMB/HIP1/KCNQ1/NCF1/OSBPL8/PICALM/PITPNC1/PLEK2/PLEKHA2/RUFY4/SCARB1/SDCBP/SLC9A1/SNX11/SNX29/SNX30/SYT5/THY1/TLN1/TNFAIP8L3/TTPA/WDFY1	28
GO:0005319	lipid transporter activity	18/1021	131/17697	0.000528108	0.0310556	0.0285728	ABCA13/ABCA5/ABCB11/ABCB4/ABCC1/GRAMD1B/GRAMD1C/NPC1/OSBPL8/PITPNC1/PLSCR3/SLC10A6/SLC27A4/SLCO1B1/SPNS2/STARD4/TNFAIP8L3/TTPA	18
GO:0005096	GTPase activator activity	30/1021	273/17697	0.000539487	0.0310556	0.0285728	ADPRH/ARAP3/ARHGAP1/ARHGAP17/ARHGAP29/ARHGAP31/ARHGEF6/ARRB1/ASAP1/CHN1/DOCK5/GMIP/JUN/MYO9B/NRP1/RAP1GAP2/RGS16/RGS18/RGS2/RGS4/RGS5/RINL/SEC23A/SH3BP1/STARD13/STXBP5/TBC1D8/TBC1D9B/TBCD/THY1	30
GO:0048018	receptor ligand activity	46/1021	482/17697	0.000559575	0.0310556	0.0285728	AREG/BMP3/BTC/CCL13/CCL18/CCL23/CCL26/CCL5/CCL7/CCL8/CMTM8/CSF2/CXCL2/EBI3/EDN1/EREG/FAM3D/FGF1/GAL/GPI/GREM1/HBEGF/IL10/IL11/IL12A/IL13/IL1A/IL5/IL6/KL/LIF/MACC1/NMB/OSM/PDGFB/QRFP/REG1A/SEMA4A/SEMA6B/STC2/TNFRSF11B/TNFSF10/TNFSF13/TNFSF18/VEGFA/VSTM1	46
GO:0005044	scavenger receptor activity	10/1021	51/17697	0.000573231	0.0310556	0.0285728	CFI/ENPP3/LGALS3BP/LOXL2/LOXL3/LOXL4/SCARB1/TINAGL1/TMPRSS5/VTN	10
GO:0048020	CCR chemokine receptor binding	9/1021	43/17697	0.000650925	0.0333056	0.0306429	CCL13/CCL18/CCL23/CCL26/CCL5/CCL7/CCL8/JAK1/STAT3	9
GO:0001227	DNA-binding transcription repressor activity, RNA polymerase II-specific	27/1021	242/17697	0.000793639	0.0384706	0.035395	ATF3/BATF3/BHLHE40/BTG2/CEBPB/CREM/ELK3/ETV3/ETV7/FOXQ1/HOXD9/JARID2/KLF16/MAFK/MNT/MXD1/MYC/NFIL3/NR2F6/OVOL1/RCOR1/SNAI3/SREBF2/TFAP2A/TFAP2C/TRPS1/ZNF281	27
GO:0030246	carbohydrate binding	29/1021	271/17697	0.00101039	0.0465285	0.0428087	ALPK1/CANX/CD209/CD34/CD69/CD93/CLEC4G/ENG/ENPP3/FCER2/G6PD/GPI/GYS1/ITLN1/LGALS1/LGALS12/LOXL2/OLR1/PLOD3/PRG2/REG1A/SELP/SIGLEC1/SIGLEC10/SIGLEC6/SIGLEC8/SLC2A3/TINAGL1/VTN	29

## Sheet: brown_gene_KEGG
ID	Description	GeneRatio	BgRatio	pvalue	p.adjust	qvalue	geneID	Count
hsa04151	PI3K-Akt signaling pathway	45/536	354/7946	2.34e-05	0.00362037	0.00299956	ANGPT2/AREG/CDK2/CDKN1A/COL4A1/COL4A2/COL6A5/COL6A6/EREG/FGF1/FLT1/GNB1/GNB2/GYS1/IL4R/IL6/ITGA2B/ITGA5/JAK1/KIT/LAMA5/LAMB1/LAMC1/MCL1/MTOR/MYC/NOS3/NR4A1/NTRK1/OSM/OSMR/PDGFB/PIK3CB/PIKER6/PPP2R1B/PPP2R5B/PRKAA2/PRKCA/SGK1/THBS1/VEGFA/VTN/VWF/YWHAG	45
hsa04510	Focal adhesion	28/536	199/7946	0.00015266	0.0157749	0.0130699	ACTN1/COL4A1/COL4A2/COL6A5/COL6A6/FLNA/FLT1/ITGA2B/ITGA5/JUN/LAMA5/LAMB1/LAMC1/MAPK8/PAK2/PARVB/PDGFB/PIK3B/PIP5K1C/PRKCA/PXN/SHC1/THBS1/TLN1/VEGFA/VTN/VWF/ZYX	28
hsa04380	Osteoclast differentiation	23/536	128/7946	1.24e-05	0.00362037	0.00299956	FHL2/FOSB/FOSL1/FOSL2/GAB2/IL1A/JAK1/JUN/JUNB/JUND/LILRA1/LILRA2/MAP3K14/MAPK14/MAPK8/NCF1/NCF2/OSCAR/PIK3CB/SIRPB1/SOCS1/TNFRSF11/TREM2	23
hsa04630	JAK-STAT signaling pathway	23/536	162/7946	0.000511904	0.02267	0.0187826	CDKN1A/CISH/CSF2/IL10/IL11/IL12A/IL13/IL4R/IL5/IL6/JAK1/LIF/MCL1/MTOR/MYC/OSM/OSMR/PDGFB/PIK3CB/PIM1/SOCS1/SOCS5/STAT3	23
hsa05418	Fluid shear stress and atherosclerosis	19/536	139/7946	0.00239762	0.0482089	0.0399422	ASS1/CDH5/DUSP1/EDN1/GSTP1/IL1A/ITGA2B/JUN/KLF2/MAPK14/MAPK8/NCF1/NCF2/NOS3/PDGFB/PIK3CB/PRKAA2/THBD/VEGFA	19
hsa04933	AGE-RAGE signaling pathway in diabetic complications	17/536	100/7946	0.000334666	0.02267	0.0187826	COL4A1/COL4A2/EDN1/EGR1/IL1A/IL6/JUN/MAPK14/MAPK8/NOS3/PIK3CB/PIM/PRKCA/SERPINE1/STAT3/THBD/VEGFA	17
hsa04668	TNF signaling pathway	17/536	112/7946	0.00127205	0.043532	0.0360673	BCL3/CCL5/CEBPB/CSF2/CXCL2/EDN1/IL6/ITCH/JUN/JUNB/LIF/MAP2K3/MAP3K14/MAP3K8/MAPK14/MAPK8/PIK3CB	17
hsa04071	Sphingolipid signaling pathway	17/536	119/7946	0.0024882	0.0482089	0.0399422	ABCC1/ACER2/ADORA3/ASAH1/GAB2/MAPK14/MAPK8/NOS3/PIK3CB/PPP2R1B/PPP2R5B/PRKCA/S1PR1/S1PR4/SGPP2	17
hsa04657	IL-17 signaling pathway	16/536	94/7946	0.000489832	0.02267	0.0187826	CCL7/CEBPB/CSF2/CXCL2/FOSB/FOSL1/IL13/IL17RA/IL17RB/IL5/IL6/JUN/JUND/MAPK14/MAPK8/TBK1	16
hsa01522	Endocrine resistance	16/536	98/7946	0.000787217	0.0305046	0.0252738	ABCB11/ADCY3/ADCY4/CDKN1A/DLL4/ESR2/HBEGF/JUN/MAPK14/MAPK8/MTOR/NOTCH1/NOTCH3/NOTCH4/PIK3CB/SHC1	16
hsa04012	ErbB signaling pathway	15/536	85/7946	0.000490586	0.02267	0.0187826	ABL2/AREG/BTC/CBL/CDKN1A/EREG/HBEGF/JUN/MAPK8/MTOR/MYC/PAK2/PIK3CB/PRKCA/SHC1	15
hsa04640	Hematopoietic cell lineage	15/536	99/7946	0.00245199	0.0482089	0.0399422	CD1C/CD34/CR1L/CSF2/FCER2/HLA-DQA/IL11/IL1A/IL4R/IL5/IL6/ITGA2B/ITGA5/ITGAM/KIT	15
hsa04610	Complement and coagulation cascades	14/536	85/7946	0.00150883	0.043532	0.0360673	A2M/C3/C4BPB/C5AR1/CFI/CR1L/F2RL2/ITGAM/ITGAX/PLAUR/SERPINE1/THBD/VTN/VWF	14
hsa04512	ECM-receptor interaction	14/536	88/7946	0.00212011	0.0482089	0.0399422	COL4A1/COL4A2/COL6A5/COL6A6/HSPG2/ITGA2B/ITGA5/LAMA5/LAMB1/LAMC1/SV2A/THBS1/VTN/VWF	14
hsa05133	Pertussis	13/536	76/7946	0.00154468	0.043532	0.0360673	C3/C4BPB/IL10/IL12A/IL1A/IL1A/IL6/IRAK1/ITGA5/ITGAM/JUN/MAPK14/MAPK8/NLRP3	13
hsa05140	Leishmaniasis	13/536	77/7946	0.00174698	0.0451303	0.0373915	C3/CR1L/HLA-DQA/IL10/IL12A/IL1A/IRAK1/ITGAM/JAK/JUN/MAPK14/NCF1/NCF2	13
